# Supplementary material
Source: publisher figshare collection journal article supplement (https://gsapubs.figshare.com/ndownloader/files/39498328)
Supplement: Supplementary file 1 [file 39498328]

| Top layer | Bottom layer | Equation for velocity map | v1 | v2 | T1 | T2 |
| --- | --- | --- | --- | --- | --- | --- |
| Water | Sea bottom | 1500 m/s |
| Sea bottom | Top Miocene | v1+ (((v2-v1)/(T2-T1))*( z - T1)) | 1500 m/s | topMioc_map | seabed_twt | topMioc_twt |
| Top Miocene | Top Cretaceous | v1+ (((v2-v1)/(T2-T1))*( z - T1)) | topMioc_map | topCret_map | topMioc_twt | topcreta_twt |
| Top Cretaceous | EABU | v1+ (((v2-v1)/(T2-T1))*( z - T1)) | topCret_map | topAlb_map | topCret_twt | topAlb_twt |
| EABU | Top Hauterivian | alb_neocom_map |
| Top Hauterivian | CABU | neocom_basement_map |
| CABU | Basement | 5500*exp(v1+ 0.0501*( z - T1)/2000 | |

TABLE S1. POLYNOMIAL LAW USED FOR THE DEPTH CONVERSION
